# Supplementary material for: Luminescence reveals variations in local structural order of calcium carbonate polymorphs formed by different mechanisms
Source: PubMed Central journal article supplement (PMC6838102; doi:10.1038/s41598-019-52587-7), 2019-11-07
Supplement: 41598_2019_52587_MOESM1_ESM.pdf [file 41598_2019_52587_MOESM1_ESM.pdf]

# **High-resolution cathodoluminescence and laser-induced fluorescence reveal variations in local structural order of calcite and aragonite formed by different mechanisms**

Michael B. Toffolo<sup>1</sup>, Giulia Ricci<sup>2</sup>, Luisa Caneve<sup>3</sup>, Ifat Kaplan-Ashiri<sup>4</sup>

<sup>1</sup>Institut de Recherche sur les Archéomatériaux-Centre de Recherche en Physique Appliquée à l'Archéologie (IRAMAT-CRP2A), UMR 5060 CNRS, Université Bordeaux Montaigne, 8 Esplanade des Antilles, Pessac 33607, France.

<sup>2</sup>Dipartimento di Geoscienze, Università degli Studi di Padova, Via Giovanni Gradenigo 6, Padova 35131, Italy.

<sup>3</sup>ENEA, Technical Unit for the Development of Applications of Radiations, CR Frascati, Via Enrico Fermi 45, Frascati 00044, Italy.

<sup>4</sup>Department of Chemical Research Support, Weizmann Institute of Science, 234 Herzl Street, Rehovot 7610001, Israel.

## **Supplementary Information**

## FTIR spectroscopy

In most cases, reference standard materials (Table 1) exhibit the diagnostic absorptions of the expected CaCO<sub>3</sub> polymorph indicated by the supplier, i.e. bands at 1430 (v<sub>3</sub>), 875 (v<sub>2</sub>) and 713 (v<sub>4</sub>) cm<sup>-1</sup> for calcite and 1475 (v<sub>3</sub>), 1083 (v<sub>1</sub>), 858 (v<sub>2</sub>), 713 and 700 (v<sub>4</sub>) cm<sup>-1</sup> for aragonite (Supplementary Figure S1). One notable exception is Calcite 2, which according to the supplier should be aragonite but exhibits peaks of calcite, presumably due to recrystallization caused by poor preservation conditions. In addition, Marble 2 contains a small amount of dolomite besides calcite, whereas Marble 5 is almost entirely made of dolomite, whose characteristic absorptions are located at 1448 (v<sub>3</sub>), 881 (v<sub>2</sub>) and 729 (v<sub>4</sub>) cm<sup>-1</sup>. Among the experimental samples, Plaster C1 and C2 show the peaks of calcite and that of Ca(OH)<sub>2</sub> at 3644 cm<sup>-1</sup> due to incomplete carbonation. Plaster A1 exhibits aragonite absorptions (with the v<sub>3</sub> shifted to 1487 cm<sup>-1</sup>) and shallow calcite peaks and shoulders besides the main aragonite component, whereas Plaster C3 and C4 include traces of aragonite represented by shallow peaks at 1083 and 858 cm<sup>-1</sup>. The *Glycimeris* shell heated to 400 °C for 2 h is composed of calcite, as well as the burnt archaeological specimen.

The normalized v<sub>2</sub> and v<sub>4</sub> intensity of each calcite and aragonite reference material were plotted in the relative grinding curve charts (Supplementary Table S1 and Figure 6). Most specimens fall in the expected areas, in agreement with previously published results using similar materials<sup>1,2</sup>. Calcite 3 and 4 are slightly less ordered at the atomic level compared to other spar samples. Limestone 1 and 2 also appear to be closer to chalk in terms of local structural order. Marble 1-4, which are made of calcite, fall between the grinding curves of chalk and ash, thus showing a relatively low degree of order. Calcite in Shell C1 and C2 is characterized by a low degree of order, similar to calcitic ash.

## ICP-MS

REE (Ce, Dy, Eu, Nd, Sm, Tb, Tm), Mn, Fe, Pb and U are the most common activator elements in carbonates, and their concentrations are listed in Supplementary Table S2. All of the samples show variable concentration of REE below 2 ppm. In particular, Ce concentration is higher in Calcite 4, Aragonite 3, Aragonite 1, Marble 1 and Limestone 2 (~30, 18, 4, 3 and 3 ppm respectively). U is mostly present in Aragonite 1 and Calcite 2, whereas Pb is present under 2 ppm except for Plaster C4, which contains ~3 ppm. Mn occurs in large concentrations in Calcite 4 and Calcite 3 with 2176 and 362 ppm, whereas in other samples it is under 20 ppm.

## References

- 1 Regev, L., Poduska, K. M., Addadi, L., Weiner, S. & Boaretto, E. Distinguishing between calcites formed by different mechanisms using infrared spectrometry: archaeological applications. *Journal of Archaeological Science* **37**, 3022-3029 (2010).
- 2 Toffolo, M. B., Regev, L., Dubernet, S., Lefrais, Y. & Boaretto, E. FTIR-Based Crystallinity Assessment of Aragonite–Calcite Mixtures in Archaeological Lime Binders Altered by Diagenesis. *Minerals* **9**, 121 (2019).

Supplementary Figure S1

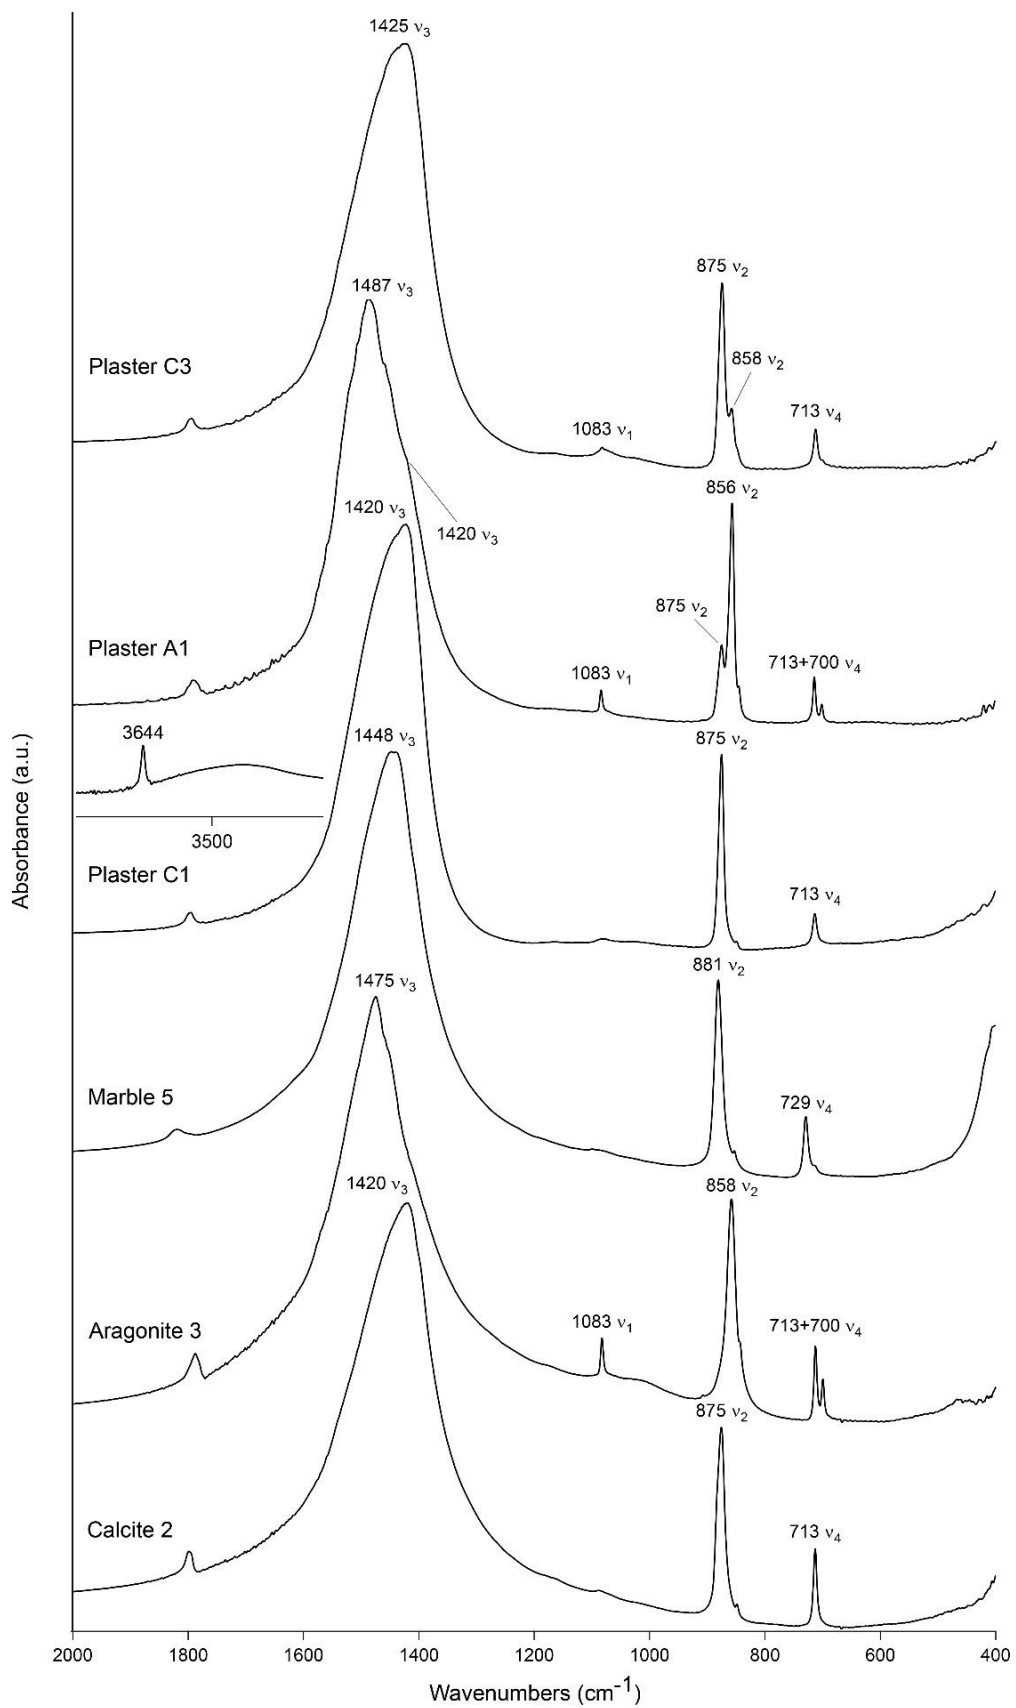

**Supplementary Figure S1.** Representative FTIR spectra of reference standard calcium carbonate materials analyzed in this study. The inset of Plaster C1 shows the location of the calcium hydroxide absorption band.

**Supplementary Table S1.** FTIR grinding curves results. Intensities of the  $\nu_2$  and  $\nu_4$  peaks of calcite and aragonite in normalized absorbance units (n.a.u.) for all the samples analyzed with SEM-CL (Table 1), including the full width at half maximum (FWHM) of the  $\nu_3$  absorption in wavenumbers ( $\text{cm}^{-1}$ ). The method is not applicable (n/a) to Marble 5, which is composed of dolomite.

| <b>Sample</b>    | <b><math>\nu_2</math> (n.a.u.)</b> | <b><math>\nu_4</math> (n.a.u.)</b> | <b><math>\nu_3</math> FWHM (<math>\text{cm}^{-1}</math>)</b> |
|------------------|------------------------------------|------------------------------------|--------------------------------------------------------------|
| Calcite 1        | 463                                | 224                                | 179                                                          |
| Calcite 2        | 458                                | 191                                | 172                                                          |
| Calcite 3        | 456                                | 148                                | 167                                                          |
| Calcite 4        | 461                                | 131                                | 158                                                          |
| Calcite 5        | 462                                | 188                                | 175                                                          |
| Chalk 1          | 440                                | 123                                | 147                                                          |
| Chalk 2          | 386                                | 99                                 | 119                                                          |
| Limestone 1      | 512                                | 144                                | 161                                                          |
| Limestone 2      | 438                                | 126                                | 140                                                          |
| Marble 1         | 441                                | 94                                 | 143                                                          |
| Marble 2         | 430                                | 84                                 | 153                                                          |
| Marble 3         | 470                                | 116                                | 157                                                          |
| Marble 4         | 454                                | 100                                | 158                                                          |
| Marble 5         | n/a                                | n/a                                | n/a                                                          |
| Nari             | 466                                | 142                                | 145                                                          |
| Shell C1         | 438                                | 135                                | 155                                                          |
| Shell C2         | 428                                | 143                                | 146                                                          |
| Plaster C1       | 462                                | 76                                 | 138                                                          |
| Plaster C2       | 423                                | 73                                 | 144                                                          |
| Plaster C3       | 447                                | 95                                 | 158                                                          |
| Plaster C4       | 511                                | 122                                | 168                                                          |
| Aragonite 1      | 425                                | 106                                | 106                                                          |
| Aragonite 2      | 415                                | 106                                | 98                                                           |
| Aragonite 3      | 493                                | 178                                | 164                                                          |
| Aragonite 4      | 414                                | 113                                | 99                                                           |
| Aragonite 5      | 519                                | 121                                | 149                                                          |
| Lisan aragonite  | 545                                | 85                                 | 103                                                          |
| Shell A1         | 387                                | 83                                 | 98                                                           |
| Kettle aragonite | 552                                | 143                                | 159                                                          |
| Plaster A1       | 526                                | 111                                | 141                                                          |

**Supplementary Table S2.** Trace element concentrations of selected samples obtained by ICP-MS.

| Sample      | Elements of interest for CL and LIF (ppm) |          |       |       |        |        |       |       |       |        |       |
|-------------|-------------------------------------------|----------|-------|-------|--------|--------|-------|-------|-------|--------|-------|
|             | Mn                                        | Fe       | Pb    | U     | Ce     | Nd     | Sm    | Eu    | Tb    | Dy     | Tm    |
| Calcite 2   | 0.959                                     | 121.904  | 0.782 | 3.595 | 0.054  | 0.031  | 0.007 | 0.002 | 0.002 | 0.004  | 0.003 |
| Calcite 3   | 361.805                                   | 122.367  | 0.751 | 0.001 | 0.064  | 0.025  | 0.013 | 0.003 | 0.005 | 0.012  | 0.005 |
| Calcite 4   | 2175.637                                  | 495.426  | 1.432 | 0.264 | 29.291 | 30.331 | 8.897 | 2.863 | 3.804 | 18.949 | 2.733 |
| Chalk 1     | 5.212                                     | 270.753  | 0.559 | 0.413 | 0.564  | 0.265  | 0.070 | 0.041 | 0.038 | 0.058  | 0.032 |
| Limestone 1 | 10.328                                    | 269.192  | 0.715 | 0.353 | 0.491  | 0.322  | 0.066 | 0.017 | 0.018 | 0.069  | 0.010 |
| Limestone 2 | 12.074                                    | 1364.885 | 0.928 | 1.223 | 2.523  | 0.652  | 0.120 | 0.039 | 0.036 | 0.138  | 0.034 |
| Marble 1    | 13.691                                    | 681.286  | 1.212 | 0.028 | 2.554  | 1.958  | 0.398 | 0.097 | 0.093 | 0.400  | 0.048 |
| Marble 2    | 19.227                                    | 326.174  | 0.737 | 0.225 | 0.580  | 0.284  | 0.050 | 0.015 | 0.016 | 0.063  | 0.011 |
| Marble 3    | 10.895                                    | 164.368  | 0.549 | 0.086 | 0.476  | 0.352  | 0.068 | 0.017 | 0.021 | 0.097  | 0.017 |
| Marble 4    | 3.891                                     | 119.111  | 0.612 | 0.034 | 0.173  | 0.117  | 0.021 | 0.005 | 0.006 | 0.023  | 0.003 |
| Marble 5    | 13.179                                    | 154.904  | 0.601 | 0.071 | 0.180  | 0.076  | 0.014 | 0.005 | 0.004 | 0.019  | 0.003 |
| Plaster C1  | 17.822                                    | 1478.886 | 1.136 | 0.320 | 1.921  | 1.272  | 0.255 | 0.065 | 0.055 | 0.246  | 0.032 |
| Plaster C4  | 13.505                                    | 835.392  | 2.982 | 0.906 | 1.116  | 0.503  | 0.105 | 0.024 | 0.017 | 0.066  | 0.007 |
| Aragonite 1 | 16.929                                    | 1082.268 | 0.893 | 1.884 | 3.700  | 1.747  | 0.537 | 0.144 | 0.123 | 0.414  | 0.017 |
| Aragonite 3 | 17.869                                    | 494.251  | 1.086 | 0.460 | 17.623 | 8.296  | 1.885 | 0.474 | 0.301 | 0.949  | 0.032 |
| Shell A1    | 13.627                                    | 181.613  | 0.535 | 0.215 | 1.108  | 0.469  | 0.067 | 0.020 | 0.012 | 0.036  | 0.003 |

**Supplementary Table S3.** SEM-CL and LIF peak locations, and relative luminescence centers (a.u.: absorbance units; NBOHC: non-bridging oxygen hole centers).

| Sample      | CL bands (nm) | Intensity (a.u.) | FWHM (nm) | CL luminescence centers                         | LIF bands (nm)          | LIF luminescence centers                                                                                           |
|-------------|---------------|------------------|-----------|-------------------------------------------------|-------------------------|--------------------------------------------------------------------------------------------------------------------|
| Calcite 1   | 457           | 90774            | 109       | Intrinsic                                       | Not analyzed            | -                                                                                                                  |
|             | 624           | 1071271          | 89        | Mn <sup>2+</sup>                                |                         |                                                                                                                    |
| Calcite 2   | 441           | 421669           | 85        | Intrinsic                                       | 465, 482, 502, 545, 572 | U(VI)                                                                                                              |
|             | 518           | 561974           | 186       | Mn <sup>2+</sup>                                | 600                     | Mn <sup>2+</sup> , Mn <sup>4+</sup>                                                                                |
| Calcite 3   | 619           | 2933294          | 76        | Mn <sup>2+</sup>                                | 417, 440, 465           | Ce <sup>3+</sup> , recombination of electrons for intrinsic emission                                               |
| Calcite 4   | 614           | 4781426          | 74        | Mn <sup>2+</sup>                                | 340, 362                | Pb <sup>2+</sup> , Ce <sup>3+</sup>                                                                                |
|             |               |                  |           |                                                 | 417, 440, 465           | Recombination of electrons for intrinsic emission, radiation induced, Tm <sup>3+</sup> and Dy <sup>3+</sup>        |
|             |               |                  |           |                                                 | 620                     | Mn <sup>2+</sup>                                                                                                   |
| Calcite 5   | 449           | 718584           | 96        | Intrinsic                                       | Not analyzed            | -                                                                                                                  |
|             | 551           | 532575           | 187       | Mn <sup>2+</sup>                                |                         |                                                                                                                    |
| Chalk 1     | 425           | 110790           | 88        | Intrinsic                                       | 542                     | Induced radiation, intrinsic emission, Tm <sup>3+</sup> , Tb <sup>3+</sup> and Dy <sup>3+</sup> , Mn <sup>2+</sup> |
|             | 613           | 153904           | 111       | Mn <sup>2+</sup>                                |                         |                                                                                                                    |
| Chalk 2     | 469           | 831018           | 118       | Intrinsic                                       | Not analyzed            | -                                                                                                                  |
|             | 625           | 2167417          | 106       | Mn <sup>2+</sup>                                |                         |                                                                                                                    |
| Limestone 1 | 461           | 75094            | 130       | Intrinsic                                       | 534                     | Induced radiation, intrinsic emission, Tm <sup>3+</sup> , Tb <sup>3+</sup> and Dy <sup>3+</sup> , Mn <sup>2+</sup> |
|             | 617           | 137251           | 119       | Mn <sup>2+</sup>                                |                         |                                                                                                                    |
| Limestone 2 | 461           | 1242945          | 116       | Intrinsic                                       | 546                     | Induced radiation, intrinsic emission, Tm <sup>3+</sup> , Tb <sup>3+</sup> and Dy <sup>3+</sup> , Mn <sup>2+</sup> |
|             | 658           | 1550492          | 102       | Mn <sup>2+</sup> (in Mg <sup>2+</sup> position) |                         |                                                                                                                    |
| Marble 1    | 441           | 324750           | 88        | Intrinsic                                       | 340, 363                | Pb <sup>2+</sup> , Ce <sup>3+</sup>                                                                                |

|            |     |         |     |                                                 |               |                                                                                                             |
|------------|-----|---------|-----|-------------------------------------------------|---------------|-------------------------------------------------------------------------------------------------------------|
|            | 621 | 1988034 | 91  | Mn <sup>2+</sup>                                | 418, 445, 465 | Recombination of electrons for intrinsic emission, radiation induced, Tm <sup>3+</sup> and Dy <sup>3+</sup> |
| Marble 2   | 443 | 745688  | 86  | Intrinsic                                       | 470           | Recombination of electrons for intrinsic emission, radiation induced, Tm <sup>3+</sup> and Dy <sup>3+</sup> |
|            | 612 | 2025013 | 90  | Mn <sup>2+</sup>                                |               |                                                                                                             |
| Marble 3   | 440 | 402371  | 85  | Intrinsic                                       | 470           | Recombination of electrons for intrinsic emission, radiation induced, Tm <sup>3+</sup> and Dy <sup>3+</sup> |
|            | 610 | 985714  | 87  | Mn <sup>2+</sup>                                |               |                                                                                                             |
| Marble 4   | 438 | 1428910 | 84  | Intrinsic                                       | 340, 363      | Pb <sup>2+</sup> , Ce <sup>3+</sup>                                                                         |
|            | 605 | 1124080 | 107 | Mn <sup>2+</sup>                                | 475           | Recombination of electrons for intrinsic emission, radiation induced, Tm <sup>3+</sup> and Dy <sup>3+</sup> |
| Marble 5   | 436 | 1291146 | 84  | Intrinsic                                       | 485           | Recombination of electrons for intrinsic emission, radiation induced, Tm <sup>3+</sup> and Dy <sup>3+</sup> |
|            | 646 | 2183015 | 85  | Mn <sup>2+</sup> (in Mg <sup>2+</sup> position) |               |                                                                                                             |
| Nari       | 444 | 865159  | 85  | Intrinsic                                       | Not analyzed  | -                                                                                                           |
|            | 607 | 1324980 | 101 | Mn <sup>2+</sup>                                |               |                                                                                                             |
| Shell C1   | 460 | 1307683 | 104 | Intrinsic                                       | Not analyzed  | -                                                                                                           |
|            | 616 | 5833153 | 121 | Mn <sup>2+</sup>                                |               |                                                                                                             |
| Shell C2   | 454 | 1114286 | 100 | Intrinsic                                       | Not analyzed  | -                                                                                                           |
|            | 611 | 915759  | 135 | Mn <sup>2+</sup>                                |               |                                                                                                             |
| Plaster C1 | 464 | 39810   | 131 | Intrinsic                                       | 418           | Radiation induced                                                                                           |
|            | 592 | 33466   | 160 | Mn <sup>2+</sup>                                | 465           | Intrinsic                                                                                                   |
| Plaster C2 | 440 | 823744  | 94  | Intrinsic                                       | Not analyzed  | -                                                                                                           |
|            | 592 | 596315  | 128 | Mn <sup>2+</sup>                                |               |                                                                                                             |
| Plaster C3 | 449 | 232627  | 93  | Intrinsic                                       | Not analyzed  | -                                                                                                           |
|            | 615 | 537628  | 92  | Mn <sup>2+</sup>                                |               |                                                                                                             |
| Plaster C4 | 443 | 392137  | 89  | Intrinsic                                       | 467           | Intrinsic                                                                                                   |



|                  |          |                     |        |                       |                                                |                                                                                                  |
|------------------|----------|---------------------|--------|-----------------------|------------------------------------------------|--------------------------------------------------------------------------------------------------|
|                  | 611      | 608599              | 101    | Mn <sup>2+</sup>      |                                                |                                                                                                  |
| Aragonite 1      | 648      | 22948               | 97     | REE, Mn <sup>2+</sup> | 335, 360, 383, 402<br>490, 510, 582<br>615     | Intrinsic, structural defects, NBOHC<br>Mn <sup>2+</sup><br>Mn <sup>2+</sup> , Mn <sup>4+</sup>  |
| Aragonite 2      | 603, 644 | 2469560,<br>3359363 | 80, 39 | REE, Mn <sup>2+</sup> | Not analyzed                                   | -                                                                                                |
| Aragonite 3      | 606, 643 | 1231384,<br>2011613 | 31, 48 | REE, Mn <sup>2+</sup> | 358, 385<br><br>468, 488, 510, 555, 590<br>618 | Structural defects, NBOHC<br><br>Mn <sup>2+</sup> , U(VI)<br>Mn <sup>2+</sup> , Mn <sup>4+</sup> |
| Aragonite 4      | 465      | 39050               | 132    | Intrinsic             | Not analyzed                                   | -                                                                                                |
|                  | 628      | 411247              | 96     | Mn <sup>2+</sup>      |                                                |                                                                                                  |
| Aragonite 5      | 441      | 491757              | 78     | Intrinsic             | Not analyzed                                   | -                                                                                                |
|                  | 624      | 236449              | 110    | Mn <sup>2+</sup>      |                                                |                                                                                                  |
| Lisan aragonite  | 481      | 1943                | 132    | Intrinsic             | Not analyzed                                   | -                                                                                                |
|                  | 619      | 4666                | 106    | Mn <sup>2+</sup>      |                                                |                                                                                                  |
| Shell A1         | 447      | 115104              | 89     | Intrinsic             | 345                                            | Intrinsic, structural defects                                                                    |
|                  | 544      | 112736              | 122    | Mn <sup>2+</sup>      | 458, 475                                       | Mn <sup>2+</sup>                                                                                 |
| Kettle aragonite | 453      | 46918               | 89     | Intrinsic             | Not analyzed                                   | -                                                                                                |
|                  | 535      | 42965               | 167    | Mn <sup>2+</sup>      |                                                |                                                                                                  |
| Plaster A1       | 449      | 38485               | 100    | Intrinsic             | Not analyzed                                   | -                                                                                                |
|                  | 531      | 34115               | 148    | Mn <sup>2+</sup>      |                                                |                                                                                                  |

---

## Supplementary Figure S2

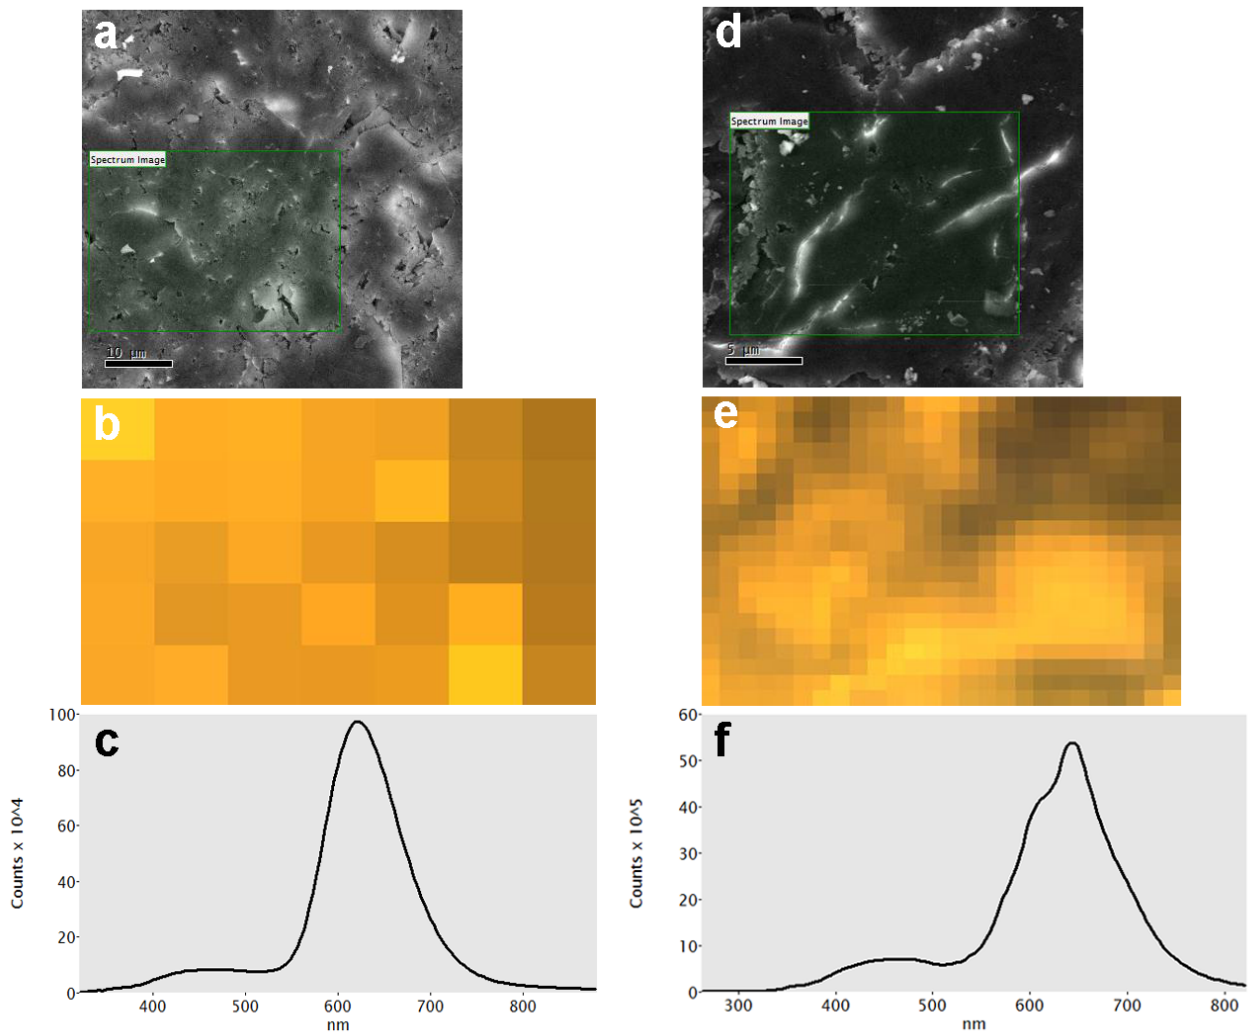

**Supplementary Figure S2.** SEM-CL spectra of calcite spar and aragonite spar. (a) SEM image of a region of interest in sample Calcite 1. (b) Spectrum imaging map of Calcite 1 showing emission colors; each pixel corresponds to a measurement. (c) Representative CL spectrum of Calcite 1. (d) SEM image of a region of interest in sample Aragonite 2. (e) Spectrum imaging map of Aragonite 2 showing emission colors; each pixel corresponds to a measurement. (f) Representative CL spectrum of Aragonite 2.

Supplementary Figure S3

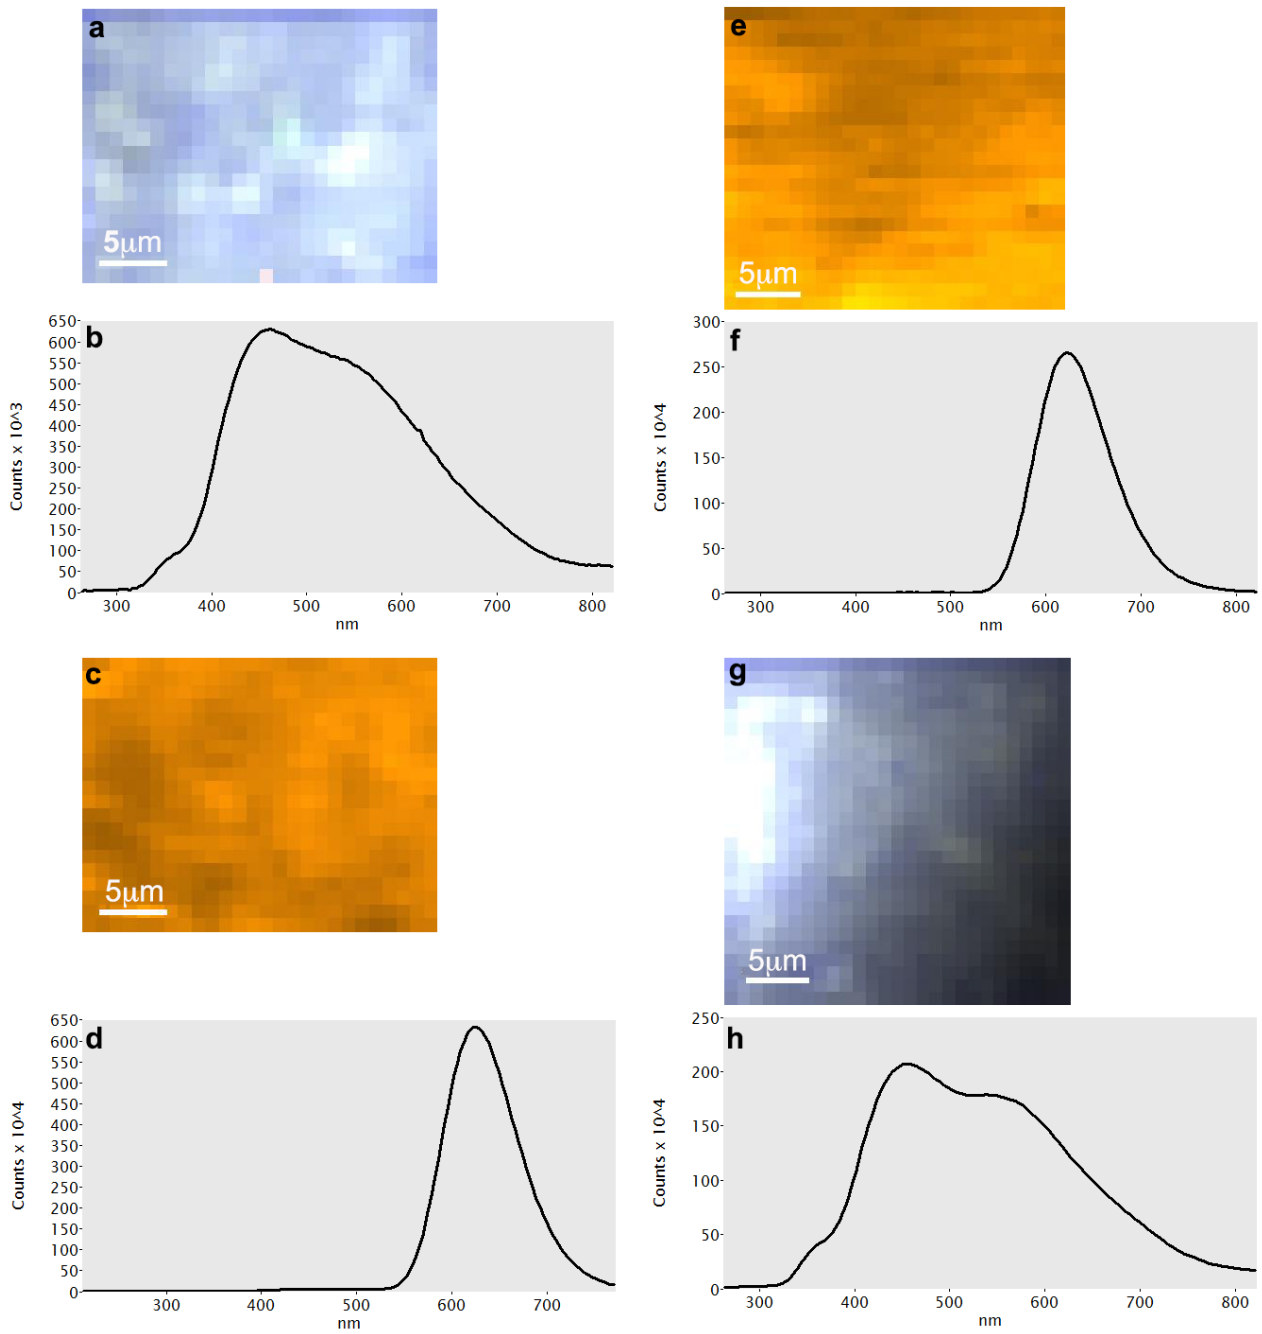

**Supplementary Figure S3.** Spectrum imaging maps and SEM-CL spectra of standard reference samples. **(a, b)** Calcite 2. **(c, d)** Calcite 3. **(e, f)** Calcite 4. **(g, h)** Calcite 5.

## Supplementary Figure S4

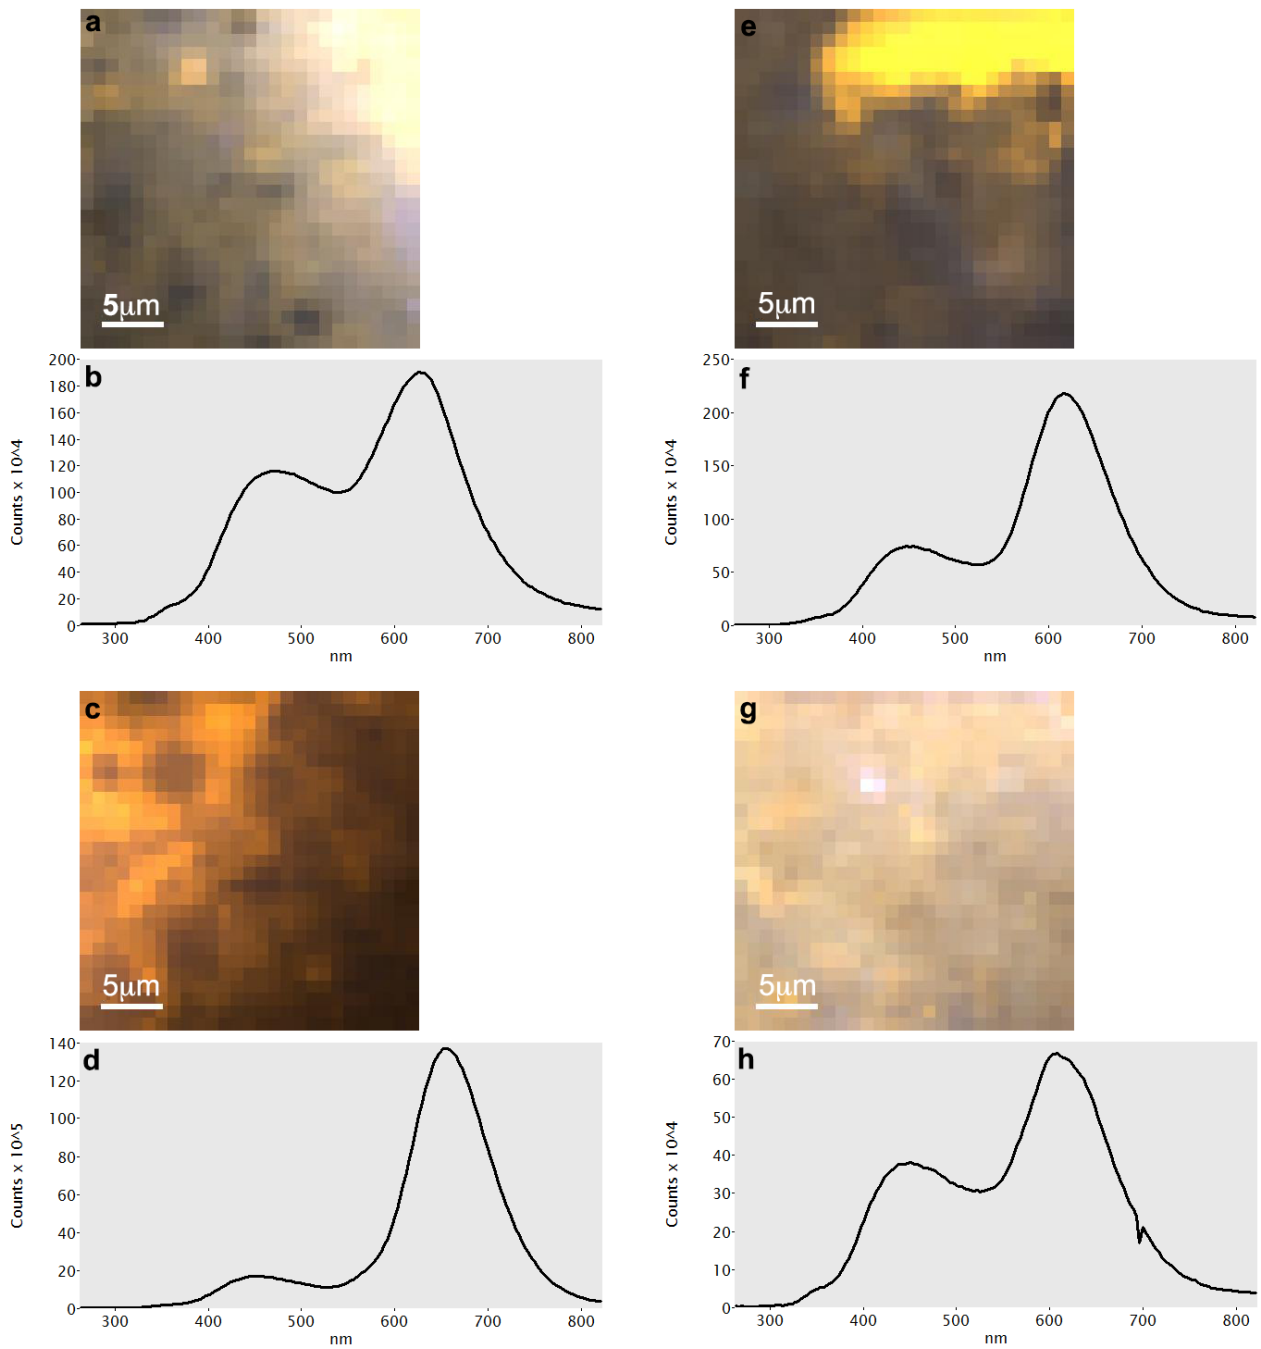

**Supplementary Figure S4.** Spectrum imaging maps and SEM-CL spectra of standard reference samples. (a, b) Chalk 2. (c, d) Limestone 2. (e, f) Marble 2. (g, h) Marble 3.

Supplementary Figure S5

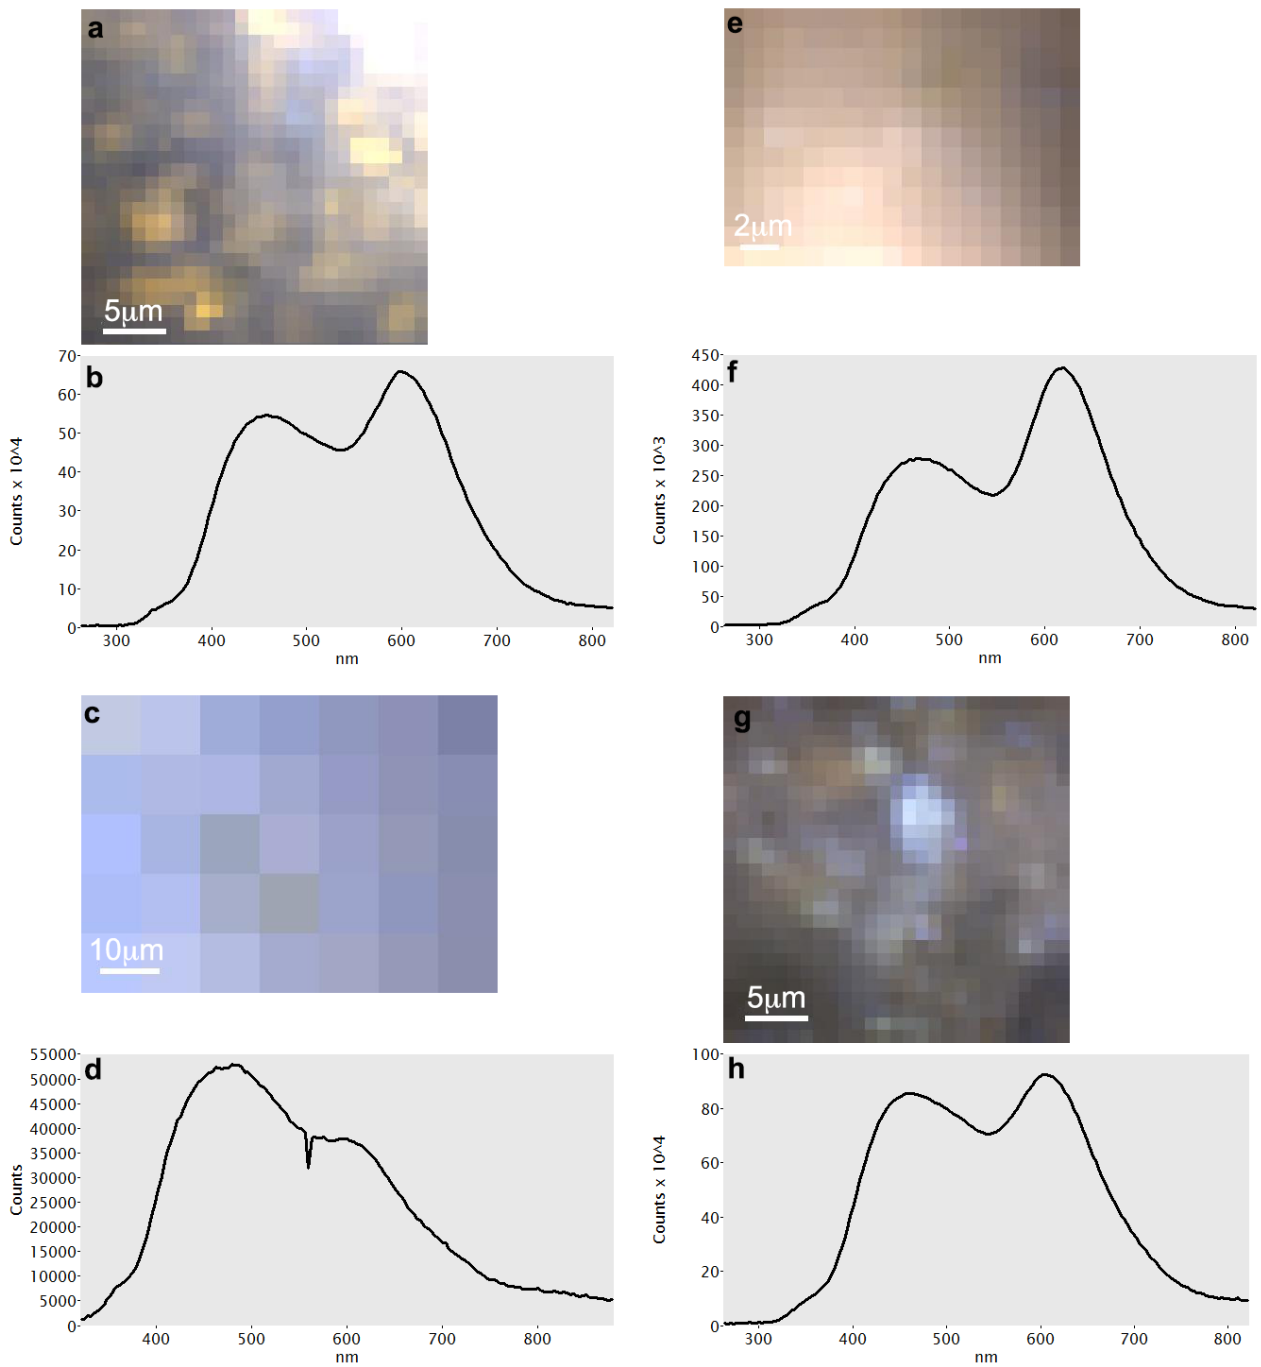

**Supplementary Figure S5.** Spectrum imaging maps and SEM-CL spectra of standard reference samples. (a, b) Nari. (c, d) Plaster C1. (e, f) Plaster C3. (g, h) Plaster C4.

Supplementary Figure S6

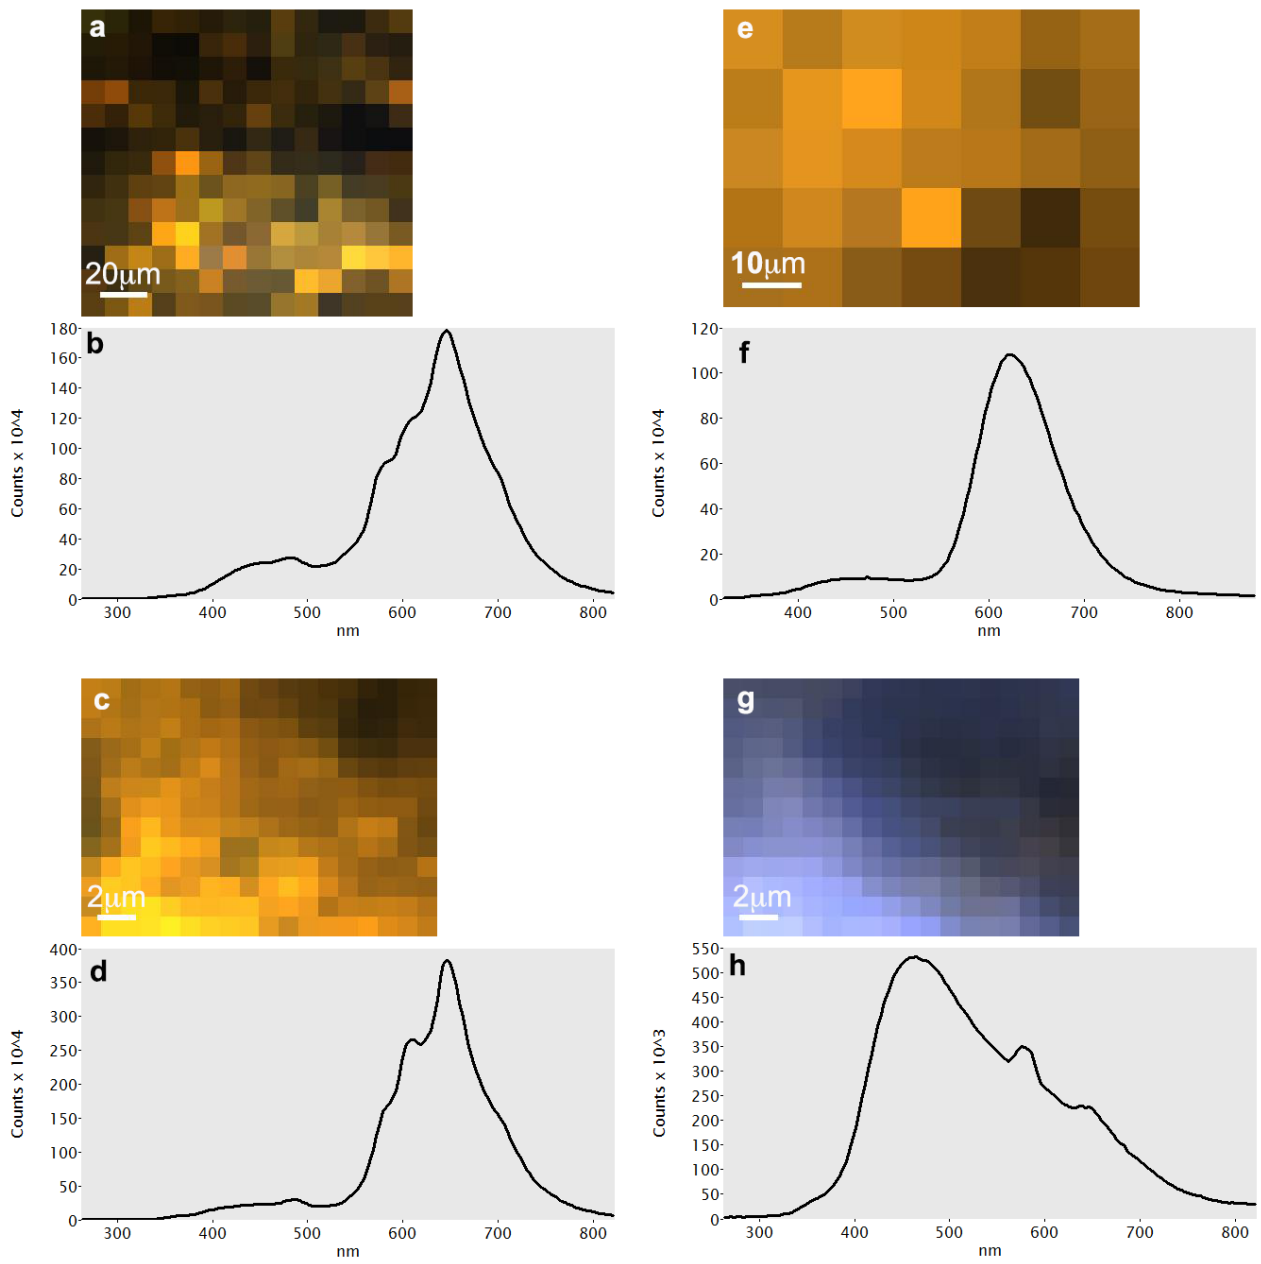

**Supplementary Figure S6.** Spectrum imaging maps and SEM-CL spectra of standard reference samples. **(a, b)** Aragonite 1. **(c, d)** Aragonite 3. **(e, f)** Aragonite 4. **(g, h)** Aragonite 5.

Supplementary Figure S7

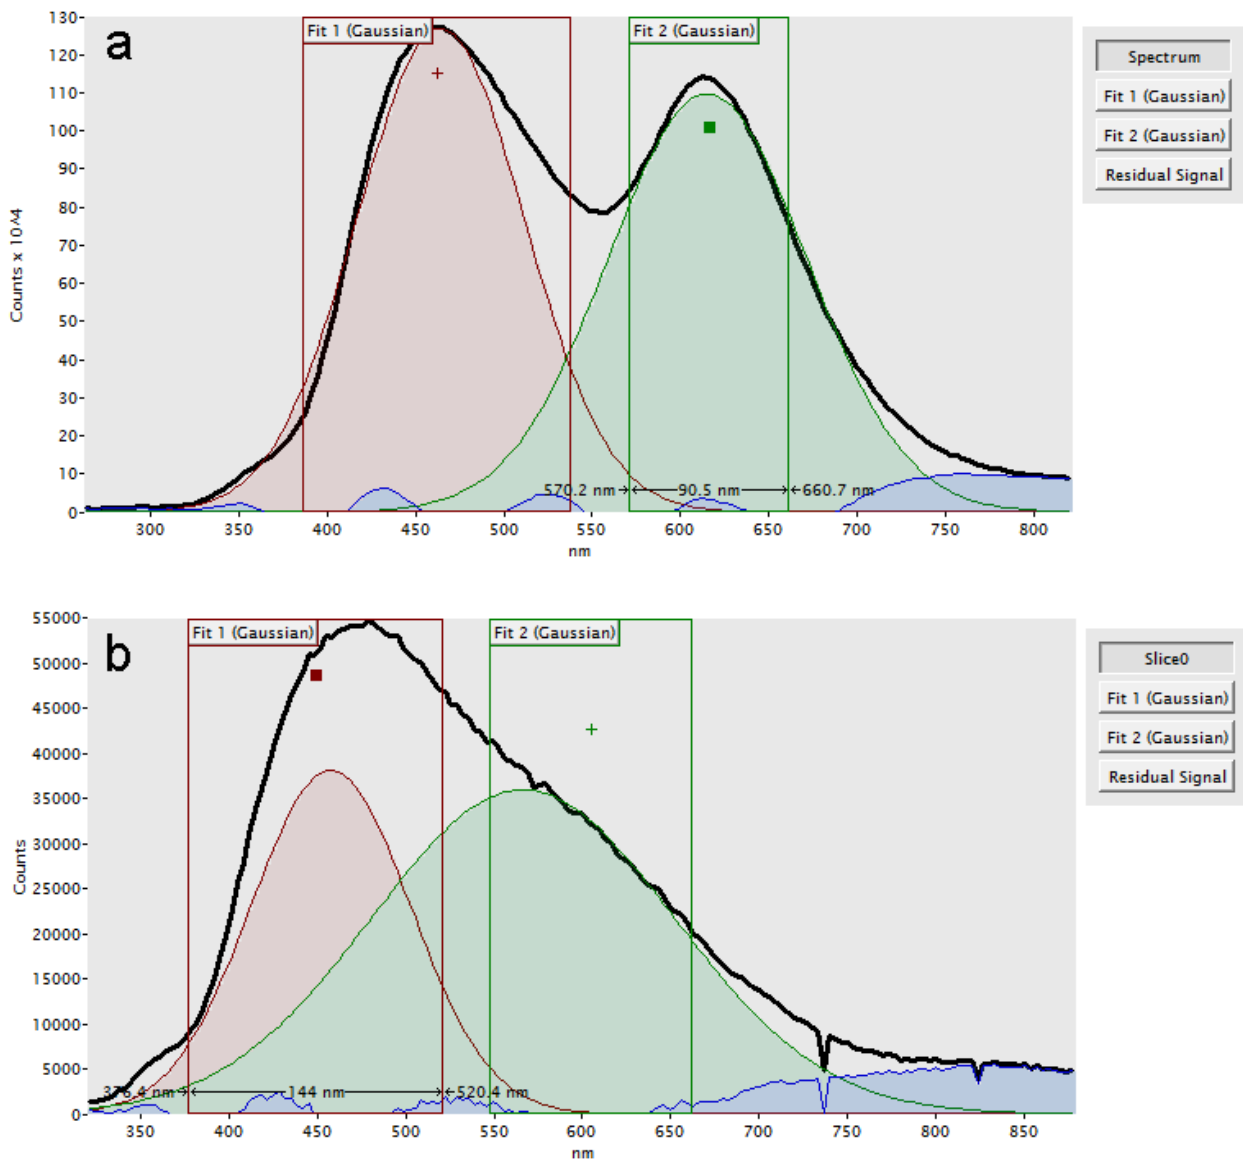

**Supplementary Figure S7.** Peak fitting of SEM-CL spectra. (a) Spectrum showing blue and orange emissions. (b) Spectrum showing dominant blue emission that masks a shoulder in the range of yellow.

Supplementary Figure S8

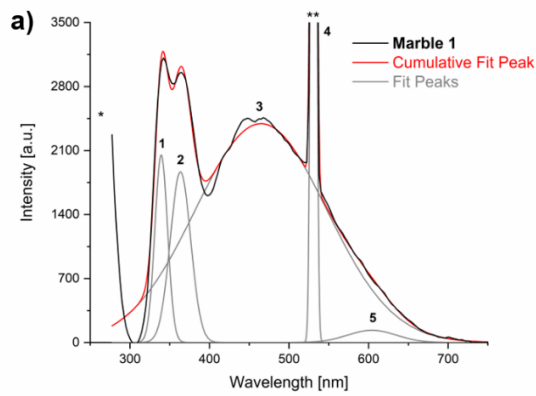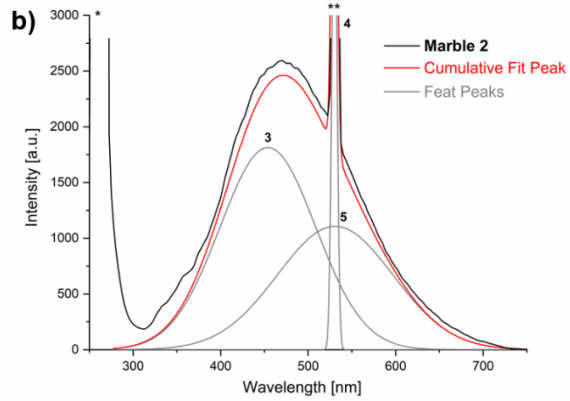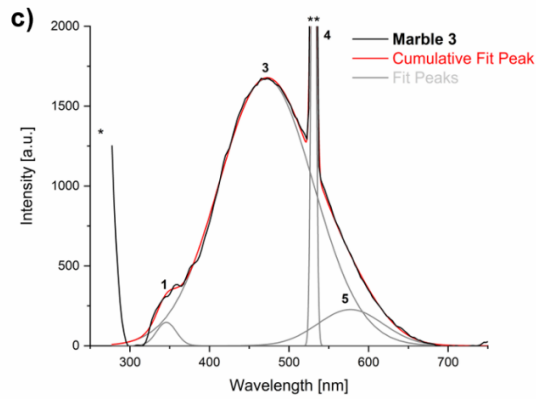

d)

| Sample   | Peak 1 | Peak 2 | Peak 3 | Peak 4 | Peak 5 |
|----------|--------|--------|--------|--------|--------|
|          | nm     |        |        |        |        |
| Marble 1 | 340    | 364    | 464    | 531    | 604    |
| Marble 2 | -      | -      | 454    | 531    | 531    |
| Marble 3 | 346    | -      | 471    | 531    | 577    |

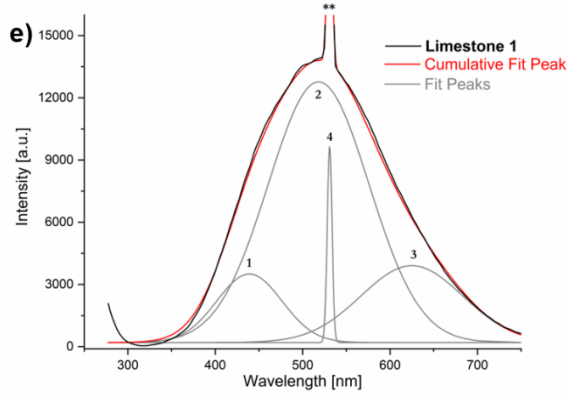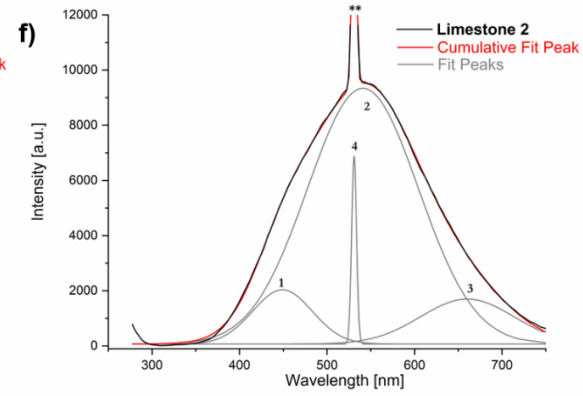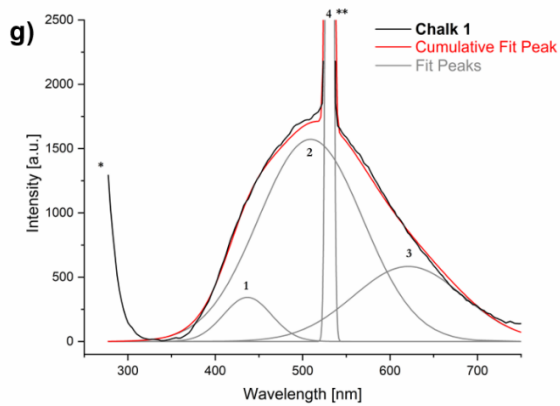

h)

| Sample      | Peak 1 | Peak 2 | Peak 3 | Peak 4 |
|-------------|--------|--------|--------|--------|
|             | nm     |        |        |        |
| Limestone 1 | 439    | 518    | 625    | 531    |
| Limestone 2 | 449    | 541    | 660    | 531    |
| Chalk 1     | 436    | 509    | 620    | 531    |

Supplementary Figure S8. Peak fitting of LIF spectra of marble, limestone and chalk samples.



**Supplementary Figure S9**

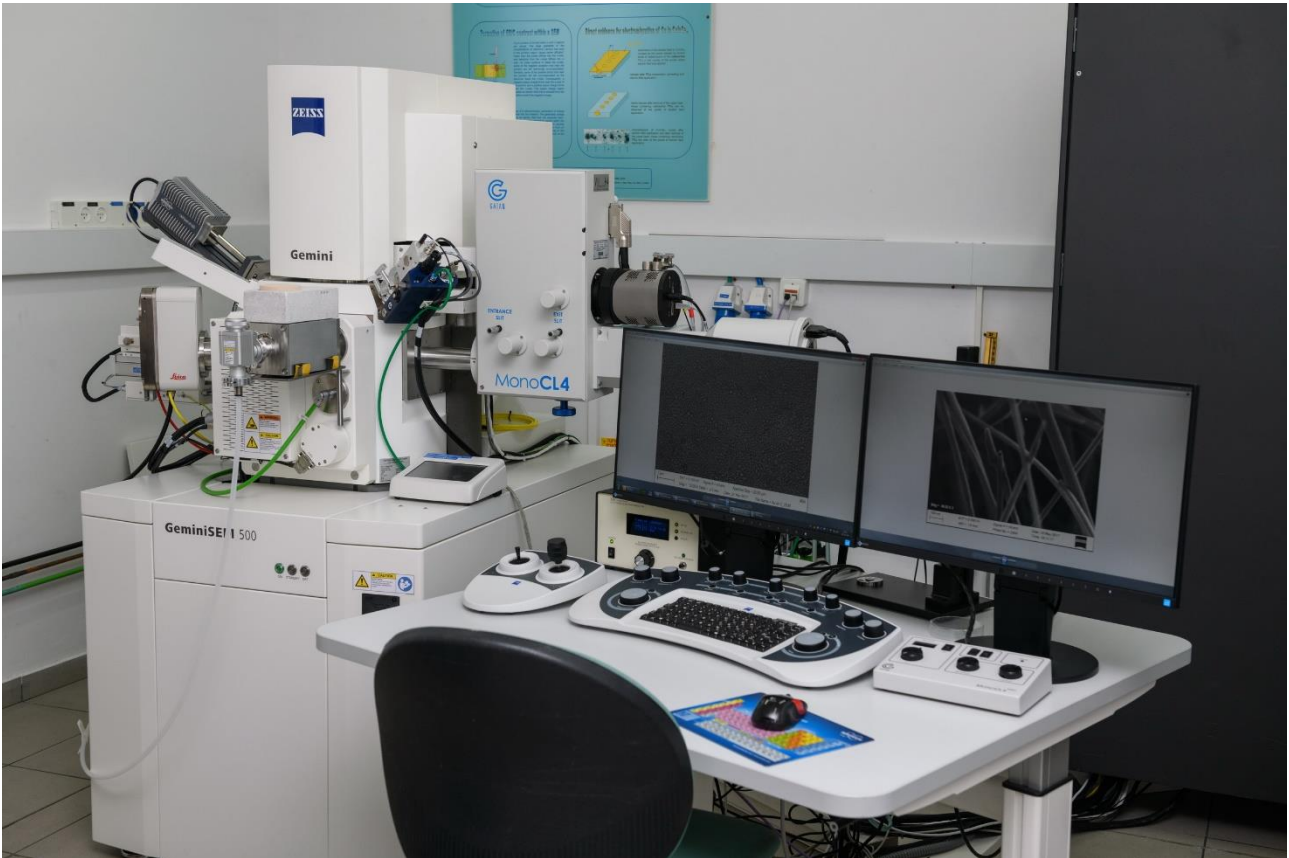

**Supplementary Figure S9.** SEM-CL analytical setup at the Moskowitz Center for Nano and Nano-Bio Imaging, Weizmann Institute of Science.

**Supplementary Figure S10**

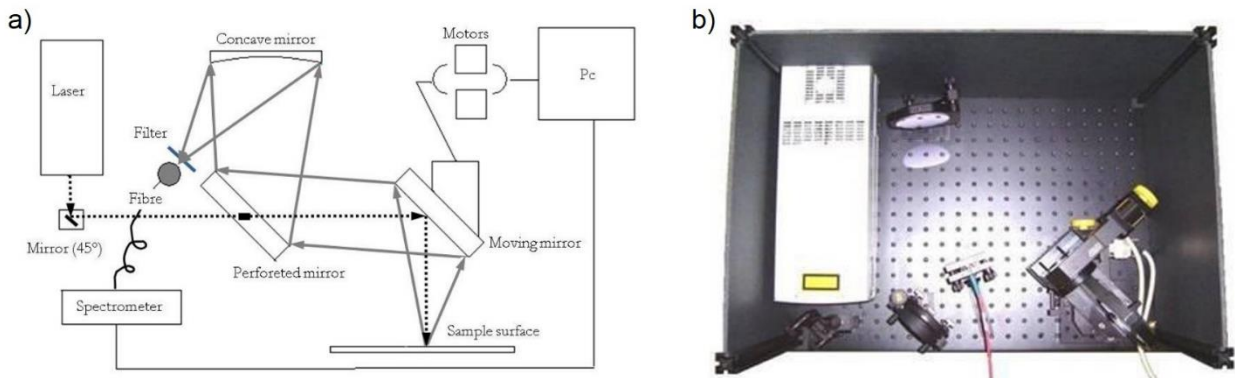

**Supplementary Figure S10.** LIF analytical setup at the Technical Unit for the Development of Applications of Radiations, ENEA. (a) Schematic representation of the apparatus. (b) Top view of the instrument.
